# Supplementary material for: Increased Aortic Arch Calcification and Cardiomegaly is Associated with Rapid Renal Progression and Increased Cardiovascular Mortality in Chronic Kidney Disease
Source: PubMed Central journal article supplement (PMC6441024; doi:10.1038/s41598-019-41841-7), 2019-03-29
Supplement: 41598_2019_41841_MOESM1_ESM.pdf [file 41598_2019_41841_MOESM1_ESM.pdf]

**Increased Aortic Arch Calcification and Cardiomegaly is Associated with Rapid Renal Progression and Increased Cardiovascular Mortality in Chronic Kidney Disease**

Szu-Chia Chen, MD, PhD<sup>1,2,3,4</sup>, Melvin Teh<sup>3</sup>, Jiun-Chi Huang, MD<sup>1,2,3,4</sup>, Pei-Yu Wu, MD<sup>1,2,4</sup>, Chiu-Yueh Chen, RN<sup>5</sup>, Yi-Chun Tsai, MD<sup>1,2,3\*</sup>, Yi-Wen Chiu, MD<sup>1,2</sup>, Jer-Ming Chang, MD, PhD<sup>1,2</sup>, Hung-Chun Chen, MD, PhD<sup>1,2</sup>

<sup>1</sup>Division of Nephrology, Department of Internal Medicine, Kaohsiung Medical University Hospital, Kaohsiung Medical University, Kaohsiung, Taiwan;

<sup>2</sup>Faculty of Renal Care, College of Medicine, Kaohsiung Medical University, Kaohsiung, Taiwan;

<sup>3</sup>School of Medicine, College of Medicine, Kaohsiung Medical University, Kaohsiung, Taiwan;

<sup>4</sup>Department of Internal Medicine, Kaohsiung Municipal Hsiao-Kang Hospital, Kaohsiung Medical University, Kaohsiung, Taiwan

<sup>5</sup>Department of Nursing, Kaohsiung Municipal Hsiao-Kang Hospital, Kaohsiung, Taiwan

\*Corresponding author

Yi-Chun Tsai, MD, PhD

Division of Nephrology, Department of Internal Medicine, Kaohsiung Medical University Hospital,

Kaohsiung Medical University, Kaohsiung, Taiwan

100 TzYou 1st Road, Kaohsiung 807, TAIWAN

TEL: 886 7 3121101-5029 FAX: 886 7 3122810

E-mail: lidam65@yahoo.com.tw

Table S1. Determinants of estimated glomerular filtration rate (eGFR) slope using linear analysis in study patients after handling missing data by multiple imputation-expectation maximization

| Parameter                                                             | Univariate                                  |          | Multivariate                                |          |
|-----------------------------------------------------------------------|---------------------------------------------|----------|---------------------------------------------|----------|
|                                                                       | Unstandardized coefficient $\beta$ (95% CI) | <i>p</i> | Unstandardized coefficient $\beta$ (95% CI) | <i>p</i> |
| AoAC (per 1 score)                                                    | -1.155(-1.468, 0.842)                       | < 0.001  | -0.997 (-1.301, -0.692)                     | <0.001   |
| CTR (per 1%)                                                          | -0.124(-0.174, -0.074)                      | <0.001   | -0.062(-0.112, -0.011)                      | 0.016    |
| Age (per 1 year)                                                      | 0.009(-0.015, 0.032)                        | 0.483    | 0.043(0.019, 0.067)                         | <0.001   |
| Gender (male <i>v.s.</i> female)                                      | -0.180(-0.778, 0.418)                       | 0.554    | 0.350(-0.227, 0.928)                        | 0.234    |
| Diabetes mellitus                                                     | -1.588(-2.167, -1.008)                      | <0.001   | -0.716 (-1.389, -0.044)                     | 0.037    |
| Hypertension                                                          | -1.737(-2.563, -0.911)                      | <0.001   | -0.718 (-1.549, 0.113)                      | 0.090    |
| Coronary artery disease                                               | -0.474(-1.322, 0.373)                       | 0.272    |                                             |          |
| Cerebrovascular disease                                               | -0.111(-1.071, 0.849)                       | 0.821    |                                             |          |
| ACEI and/or ARB use                                                   | 0.338(-0.259, 0.935)                        | 0.267    | 0.599(0.026, 1.172)                         | 0.041    |
| Systolic blood pressure (per 1 mmHg)                                  | -0.012(-0.024, 0.001)                       | 0.074    |                                             |          |
| Diastolic blood pressure (per 1 mmHg)                                 | 0.027(0.006, 0.047)                         | 0.013    | 0.014(-0.007, 0.035)                        | 0.200    |
| Body mass index (per 1 kg/m <sup>2</sup> )                            | 0.004(-0.071, 0.079)                        | 0.913    |                                             |          |
| Fasting glucose (per 1 mg/dL)                                         | -0.007(-0.013, -0.002)                      | 0.010    | -0.002(-0.007, 0.004)                       | 0.541    |
| Hemoglobin (per 1 g/dL)                                               | 0.312(0.183, 0.441)                         | <0.001   | -0.062 (-0.230, 0.107)                      | 0.471    |
| Baseline eGFR (per 1 mL/min/1.73m <sup>2</sup> )                      | 0.063(0.042, 0.083)                         | <0.001   | 0.024(-0.005, 0.051)                        | 0.085    |
| Calcium-phosphorous product (per 1 mg <sup>2</sup> /dL <sup>2</sup> ) | -0.049(-0.085, -0.013)                      | 0.008    | 0.014(-0.022, 0.050)                        | 0.446    |
| Total cholesterol (per 1 mg/dL)                                       | -0.003(-0.008, 0.003)                       | 0.324    |                                             |          |

|                                                |                        |         |                        |        |
|------------------------------------------------|------------------------|---------|------------------------|--------|
| Log-transformed triglyceride (log per 1 mg/dL) | -0.303(-1.534, 0.929)  | 0.629   |                        |        |
| HDL-cholesterol (per 1 mg/dL)                  | -0.009(-0.032, 0.014)  | 0.454   |                        |        |
| LDL-cholesterol (per 1 mg/dL)                  | -0.003(-0.010, 0.005)  | 0.486   |                        |        |
| Albumin (per 1 g/dL)                           | 2.747(2.068, 3.427)    | < 0.001 | 1.725(1.012, 2.437)    | <0.001 |
| Upcr (log per 1 mg/g)                          | -2.228(-2.714, -1.742) | < 0.001 | -1.051(-1.639, -0.463) | <0.001 |

Values expressed as unstandardized coefficient  $\beta$  and 95% confidence interval (CI). Abbreviations are the same as in Table 1.

Multivariate model: adjust for age, sex and ACEI/ARB usage plus variables of p-value <0.05 in univariate analysis

**Table S2.** Determinants of rapid renal progression (estimated glomerular filtration rate (eGFR) slope < -3 ml/min/1.73 m<sup>2</sup>/year) using logistic analysis in study patients after handling missing data by multiple imputation - expectation maximization

| Parameter                                  | Univariate         |          | Multivariate        |          | Multivariate       |          |
|--------------------------------------------|--------------------|----------|---------------------|----------|--------------------|----------|
|                                            | OR (95% CI)        | <i>p</i> | OR (95% CI)         | <i>p</i> | OR (95% CI)        | <i>p</i> |
| Study group                                |                    |          |                     |          |                    |          |
| AoAC < 4 and CTR < 50%                     | Reference          |          | Reference           |          | -                  | -        |
| AoAC < 4 and CTR ≥ 50%                     | 2.557(1.505-4.346) | 0.001    | 2.299(1.249-4.234)  | 0.008    | -                  | -        |
| AoAC ≥ 4 and CTR < 50%                     | 2.371(1.451-3.874) | 0.001    | 3.273(1.813-5.911)  | <0.001   | -                  | -        |
| AoAC ≥ 4 and CTR ≥ 50%                     | 5.597(3.381-9.265) | <0.001   | 5.403(2.884-10.122) | <0.001   | -                  | -        |
| AoAC (per 1 score)                         | 2.098(1.657-2.658) | <0.001   | -                   | -        | 2.479(1.844-3.334) | <0.001   |
| CTR (per 1%)                               | 1.090(1.056-1.125) | <0.001   | -                   | -        | 1.048(1.007-1.091) | 0.021    |
| Age (per 1 year)                           | 0.991(0.978-1.005) | 0.991    | 0.973(0.956-0.991)  | 0.004    | 0.967(0.948-0.986) | 0.001    |
| Gender (male v.s. female)                  | 1.331(0.943-1.878) | 0.103    | 0.864(0.551-1.354)  | 0.523    | 0.840(0.529-1.334) | 0.461    |
| Diabetes mellitus                          | 2.112(1.482-3.010) | <0.001   | 1.107(0.679-1.805)  | 0.683    | 1.158(0.704-1.904) | 0.565    |
| Hypertension                               | 2.687(1.528-4.725) | 0.001    | 2.282(1.140-4.568)  | 0.020    | 2.198(1.090-4.432) | 0.028    |
| Coronary artery disease                    | 1.565(0.970-2.525) | 0.066    | -                   | -        | -                  | -        |
| Cerebrovascular disease                    | 0.724(0.408-1.287) | 0.724    | -                   | -        | -                  | -        |
| ACEI and/or ARB use                        | 0.819(0.581-1.155) | 0.255    | 0.719(0.450-1.148)  | 0.167    | 0.744(0.463-1.195) | 0.221    |
| Systolic blood pressure (per 1 mmHg)       | 1.009(1.002-1.017) | 0.015    | 0.999(0.990-1.008)  | 0.827    | 0.996(0.987-1.006) | 0.457    |
| Diastolic blood pressure (per 1 mmHg)      | 0.991(0.979-1.003) | 0.151    | -                   | -        | -                  | -        |
| Body mass index (per 1 kg/m <sup>2</sup> ) | 1.009(0.967-1.054) | 0.672    | -                   | -        | -                  | -        |
| Fasting glucose (per 1 mg/dL)              | 1.005(1.002-1.008) | 0.004    | 1.005(1.000-1.009)  | 0.033    | 1.004(1.000-1.008) | 0.080    |

|                                                                       |                    |        |                    |        |                    |        |
|-----------------------------------------------------------------------|--------------------|--------|--------------------|--------|--------------------|--------|
| Hemoglobin (per 1 g/dL)                                               | 0.807(0.743-0.876) | <0.001 | 1.017(0.892-1.159) | 0.807  | 1.003(0.878-1.146) | 0.961  |
| Baseline eGFR (per 1 mL/min/1.73m <sup>2</sup> )                      | 0.951(0.938-0.966) | <0.001 | 0.970(0.949-0.992) | 0.007  | 0.971(0.950-0.993) | 0.011  |
| Calcium-phosphorous product (per 1 mg <sup>2</sup> /dL <sup>2</sup> ) | 1.040(1.018-1.063) | <0.001 | 0.988(0.959-1.017) | 0.417  | 0.992(0.963-1.022) | 0.584  |
| Total cholesterol (per 1 mg/dL)                                       | 1.003(1.000-1.006) | 0.079  | -                  | -      | -                  | -      |
| Log-transformed triglyceride (log per 1 mg/dL)                        | 1.424(0.700-2.899) | 0.330  | -                  | -      | -                  | -      |
| HDL-cholesterol (per 1 mg/dL)                                         | 1.009(0.996-1.023) | 0.181  | -                  | -      | -                  | -      |
| LDL-cholesterol (per 1 mg/dL)                                         | 1.001(0.997-1.006) | 0.522  | -                  | -      | -                  | -      |
| Albumin (per 1 g/dL)                                                  | 0.184(0.111-0.304) | <0.001 | 0.428(0.236-0.777) | 0.005  | 0.409(0.223-0.750) | 0.004  |
| Upr (log per 1 mg/g)                                                  | 5.849(3.871-8.837) | <0.001 | 2.735(1.620-4.617) | <0.001 | 2.684(1.573-4.581) | <0.001 |

Values expressed as odds ratio (OR) and 95% confidence interval (CI). Abbreviations are the same as in Table 1.

Multivariate model: adjust for age, sex and ACEI/ARB usage plus variables of p-value <0.05 in univariate analysis

**Table S3.** Determinants of cardiovascular mortality using Cox proportional hazards model in study patients after handling missing data by multiple imputation - expectation maximization

| Parameter                                  | Univariate          |          | Multivariate        |          | Multivariate       |          |
|--------------------------------------------|---------------------|----------|---------------------|----------|--------------------|----------|
|                                            | HR (95% CI)         | <i>p</i> | HR (95% CI)         | <i>p</i> | HR (95% CI)        | <i>p</i> |
| Study group                                |                     |          |                     |          |                    |          |
| AoAC < 4 and CTR < 50%                     | Reference           |          | Reference           |          | -                  | -        |
| AoAC < 4 and CTR ≥ 50%                     | 3.836(1.181-12.460) | 0.025    | 3.214(0.981-10.529) | 0.054    | -                  | -        |
| AoAC ≥ 4 and CTR < 50%                     | 1.606(0.453-5.691)  | 0.463    | 1.311(0.368-4.673)  | 0.677    | -                  | -        |
| AoAC ≥ 4 and CTR ≥ 50%                     | 6.624(2.253-19.474) | 0.001    | 4.486(1.476-13.631) | 0.008    | -                  | -        |
| AoAC (per 1 score)                         | 1.502(0.959-2.353)  | 0.076    | -                   | -        | 1.145(0.735-1.782) | 0.550    |
| CTR (per 1%)                               | 1.113(1.057-1.173)  | <0.001   | -                   | -        | 1.100(1.034-1.171) | 0.002    |
| Age (per 1 year)                           | 1.080(1.043-1.119)  | <0.001   | 1.064(1.026-1.103)  | 0.001    | 1.066(1.029-1.104) | <0.001   |
| Gender (male v.s. female)                  | 1.806(0.955-3.416)  | 0.069    | 1.269(0.636-2.534)  | 0.500    | 1.224(0.615-2.438) | 0.564    |
| Diabetes mellitus                          | 1.634(0.824-3.239)  | 0.160    | -                   | -        | -                  | -        |
| Hypertension                               | 6.637(0.911-48.382) | 0.062    | -                   | -        | -                  | -        |
| Coronary artery disease                    | 1.821(0.834-3.975)  | 0.133    | -                   | -        | -                  | -        |
| Cerebrovascular disease                    | 1.658(0.693-3.967)  | 0.256    | -                   | -        | -                  | -        |
| ACEI and/or ARB use                        | 0.819(0.581-1.155)  | 0.255    | -                   | -        | -                  | -        |
| Systolic blood pressure (per 1 mmHg)       | 1.001(0.987-1.015)  | 0.920    | -                   | -        | -                  | -        |
| Diastolic blood pressure (per 1 mmHg)      | 0.984(0.961-1.008)  | 0.984    | -                   | -        | -                  | -        |
| Body mass index (per 1 kg/m <sup>2</sup> ) | 0.909(0.831-0.995)  | 0.039    | 0.915(0.829-1.011)  | 0.082    | 0.919(0.831-1.015) | 0.096    |
| Fasting glucose (per 1 mg/dL)              | 1.001(0.995-1.007)  | 0.743    | -                   | -        | -                  | -        |

|                                                                       |                    |       |                    |       |                    |       |
|-----------------------------------------------------------------------|--------------------|-------|--------------------|-------|--------------------|-------|
| Hemoglobin (per 1 g/dL)                                               | 0.864(0.747-0.999) | 0.049 | 0.968(0.807-1.161) | 0.729 | 0.986(0.821-1.183) | 0.877 |
| Baseline eGFR (per 1 mL/min/1.73m <sup>2</sup> )                      | 0.976(0.951-1.001) | 0.056 | -                  | -     | -                  | -     |
| Calcium-phosphorous product (per 1 mg <sup>2</sup> /dL <sup>2</sup> ) | 1.009(0.972-1.048) | 0.632 | -                  | -     | -                  | -     |
| Total cholesterol (per 1 mg/dL)                                       | 0.998(0.992-1.005) | 0.624 | -                  | -     | -                  | -     |
| Log-transformed triglyceride (log per 1 mg/dL)                        | 0.908(0.234-3.528) | 0.889 | -                  | -     | -                  | -     |
| HDL-cholesterol (per 1 mg/dL)                                         | 0.991(0.965-1.018) | 0.519 | -                  | -     | -                  | -     |
| LDL-cholesterol (per 1 mg/dL)                                         | 0.997(0.989-1.006) | 0.549 | -                  | -     | -                  | -     |
| Albumin (per 1 g/dL)                                                  | 0.528(0.277-1.005) | 0.052 | 0.607(0.267-1.380) | 0.233 | 0.607(0.270-1.365) | 0.227 |
| Upr (log per 1 mg/g)                                                  | 1.000(1.000-1.000) | 0.340 | -                  | -     | -                  | -     |

Values expressed as hazard ratio (HR) and 95% confidence interval (CI). Abbreviations are the same as in Table 1.

Multivariate model: adjust for age and sex plus variables of p-value <0.05 in univariate analysis

**Table S4.** The colinearity analysis in variables of multivariate model

| Parameter                                                             | Multivariate                                   |          |           |       |
|-----------------------------------------------------------------------|------------------------------------------------|----------|-----------|-------|
|                                                                       | Unstandardized<br>coefficient $\beta$ (95% CI) | <i>p</i> | Tolerance | VIF   |
| AoAC (per 1 score)                                                    | -1.008(-1.320, -0.697)                         | <0.001   | 0.878     | 1.138 |
| CTR (per 1%)                                                          | -0.061(-0.112, -0.010)                         | 0.020    | 0.815     | 1.227 |
| Age (per 1 year)                                                      | 0.045(0.020, 0.069)                            | <0.001   | 0.786     | 1.272 |
| Gender (male v.s. female)                                             | 0.347(-0.245, 0.939)                           | 0.251    | 0.817     | 1.224 |
| Diabetes mellitus                                                     | -0.672(-1.364, 0.019)                          | 0.057    | 0.598     | 1.673 |
| Hypertension                                                          | -0.765(-1.611, 0.081)                          | 0.076    | 0.842     | 1.188 |
| ACEI and/or ARB use                                                   | 0.633(0.043, 1.224)                            | 0.036    | 0.817     | 1.224 |
| Diastolic blood pressure (per 1 mmHg)                                 | 0.015(-0.007, 0.037)                           | 0.174    | 0.732     | 1.366 |
| Fasting glucose (per 1 mg/dL)                                         | -0.001(-0.007, 0.004)                          | 0.583    | 0.815     | 1.227 |
| Hemoglobin (per 1 g/dL)                                               | -0.055(-0.227, 0.117)                          | 0.529    | 0.463     | 2.158 |
| Baseline eGFR (per 1 mL/min/1.73m <sup>2</sup> )                      | 0.020(0.008, 0.049)                            | 0.163    | 0.468     | 2.137 |
| Calcium-phosphorous product (per 1 mg <sup>2</sup> /dL <sup>2</sup> ) | 0.015(-0.022, 0.051)                           | 0.435    | 0.720     | 1.389 |
| Albumin (per 1 g/dL)                                                  | 1.708(0.972, 2.444)                            | <0.001   | 0.718     | 1.394 |
| Upcr (log per 1 mg/g)                                                 | -1.081(-1.688, 0.474)                          | 0.001    | 0.527     | 1.898 |
