# Supplementary material for: Increased Aortic Arch Calcification and Cardiomegaly is Associated with Rapid Renal Progression and Increased Cardiovascular Mortality in Chronic Kidney Disease
Source: PubMed Central journal article supplement (PMC6441024; doi:10.1038/s41598-019-41841-7), 2019-03-29
Supplement: 41598_2019_41841_MOESM2_ESM.pdf [file 41598_2019_41841_MOESM2_ESM.pdf]

**Increased Aortic Arch Calcification and Cardiomegaly is Associated with Rapid Renal Progression and Increased Cardiovascular Mortality in Chronic Kidney Disease**

Szu-Chia Chen, MD, PhD<sup>1,2,3,4</sup>, Melvin Teh<sup>3</sup>, Jiun-Chi Huang, MD<sup>1,2,3,4</sup>, Pei-Yu Wu, MD<sup>1,2,4</sup>, Chiu-Yueh Chen, RN<sup>5</sup>, Yi-Chun Tsai, MD<sup>1,2,3\*</sup>, Yi-Wen Chiu, MD<sup>1,2</sup>, Jer-Ming Chang, MD, PhD<sup>1,2</sup>, Hung-Chun Chen, MD, PhD<sup>1,2</sup>

<sup>1</sup>Division of Nephrology, Department of Internal Medicine, Kaohsiung Medical University Hospital, Kaohsiung Medical University, Kaohsiung, Taiwan;

<sup>2</sup>Faculty of Renal Care, College of Medicine, Kaohsiung Medical University, Kaohsiung, Taiwan;

<sup>3</sup>School of Medicine, College of Medicine, Kaohsiung Medical University, Kaohsiung, Taiwan;

<sup>4</sup>Department of Internal Medicine, Kaohsiung Municipal Hsiao-Kang Hospital, Kaohsiung Medical University, Kaohsiung, Taiwan

<sup>5</sup>Department of Nursing, Kaohsiung Municipal Hsiao-Kang Hospital, Kaohsiung, Taiwan

\*Corresponding author

Yi-Chun Tsai, MD, PhD

Division of Nephrology, Department of Internal Medicine, Kaohsiung Medical University Hospital,

Kaohsiung Medical University, Kaohsiung, Taiwan

100 TzYou 1st Road, Kaohsiung 807, TAIWAN

TEL: 886 7 3121101-5029 FAX: 886 7 3122810

E-mail: lidam65@yahoo.com.tw

**STROBE statement-checklist of items that should be included in reports of observational studies.**

|                           | <b>Item No</b> | <b>Recommendation</b>                                                                                                                                                                | <b>Checklist</b> | <b>Pages</b> |
|---------------------------|----------------|--------------------------------------------------------------------------------------------------------------------------------------------------------------------------------------|------------------|--------------|
| <b>Title and abstract</b> | 1              | (a) Indicate the study's design with a commonly used term in the title or the abstract                                                                                               | Yes              | 1            |
|                           |                | (b) Provide in the abstract an informative and balanced summary of what was done and what was found                                                                                  | Yes              | 3            |
| <b>Introduction</b>       |                |                                                                                                                                                                                      |                  |              |
| Background/rationale      | 2              | Explain the scientific background and rationale for the investigation being reported                                                                                                 | Yes              | 5            |
| Objectives                | 3              | State specific objectives, including any prespecified hypotheses                                                                                                                     | Yes              | 6            |
| <b>Methods</b>            |                |                                                                                                                                                                                      |                  |              |
| Study design              | 4              | Present key elements of study design early in the paper                                                                                                                              | Yes              | 15           |
| Setting                   | 5              | Describe the setting, locations, and relevant dates, including periods of recruitment, exposure, follow-up, and data collection                                                      | Yes              | 15           |
| Participants              | 6              | (a) <i>Cohort study</i> —Give the eligibility criteria, and the sources and methods of selection of participants. Describe methods of follow-up                                      | Yes              | 15           |
|                           |                | (b) <i>Cohort study</i> —For matched studies, give matching criteria and number of exposed and unexposed                                                                             | N/A              |              |
| Variables                 | 7              | Clearly define all outcomes, exposures, predictors, potential confounders, and effect modifiers. Give diagnostic criteria, if applicable                                             | Yes              | 15-16        |
| Data sources/measurement  | 8*             | For each variable of interest, give sources of data and details of methods of assessment (measurement). Describe comparability of assessment methods if there is more than one group | Yes              | 16-17        |
| Bias                      | 9              | Describe any efforts to address potential sources of bias                                                                                                                            | Yes              | 18           |
| Study size                | 10             | Explain how the study size was arrived at                                                                                                                                            | Yes              | 15           |
| Quantitative variables    | 11             | Explain how quantitative variables were handled in the analyses. If applicable, describe which groupings were chosen and why                                                         | Yes              | 15-17        |
| Statistical methods       | 12             | (a) Describe all statistical methods, including those used to control for confounding                                                                                                | Yes              | 18           |
|                           |                | (b) Describe any methods used to examine subgroups and interactions                                                                                                                  | Yes              | 18           |
|                           |                | (c) Explain how missing data were addressed                                                                                                                                          | Yes              | 18           |
|                           |                | (d) <i>Cohort study</i> —If applicable, explain how loss to follow-up was addressed                                                                                                  | Yes              | 17           |
|                           |                | (e) Describe any sensitivity analyses                                                                                                                                                | Yes              | 18           |
| <b>Results</b>            |                |                                                                                                                                                                                      |                  |              |
| Participants              | 13*            | (a) Report numbers of individuals at each stage of study—eg numbers potentially                                                                                                      | Yes              | 7,15         |

|                          |     |                                                                                                                                                                                                              |     |                   |
|--------------------------|-----|--------------------------------------------------------------------------------------------------------------------------------------------------------------------------------------------------------------|-----|-------------------|
|                          |     | eligible, examined for eligibility, confirmed eligible, included in the study, completing follow-up, and analyzed                                                                                            |     |                   |
|                          |     | (b) Give reasons for non-participation at each stage                                                                                                                                                         | Yes | 15                |
|                          |     | (c) Consider use of a flow diagram                                                                                                                                                                           | Yes | Figure 4          |
| Descriptive data         | 14* | (a) Give characteristics of study participants (eg demographic, clinical, social) and information on exposures and potential confounders                                                                     | Yes | 7, Table 1        |
|                          |     | (b) Indicate number of participants with missing data for each variable of interest                                                                                                                          | Yes | Table 1           |
|                          |     | (c) <i>Cohort study</i> —Summarise follow-up time (eg, average and total amount)                                                                                                                             | Yes | 10                |
| Outcome data             | 15* | <i>Cohort study</i> —Report numbers of outcome events or summary measures over time                                                                                                                          | Yes | 10, Table 1       |
|                          |     | <i>Case-control study</i> —Report numbers in each exposure category, or summary measures of exposure                                                                                                         | N/A |                   |
|                          |     | <i>Cross-sectional study</i> —Report numbers of outcome events or summary measures                                                                                                                           | N/A |                   |
| Main results             | 16  | (a) Give unadjusted estimates and, if applicable, confounder-adjusted estimates and their precision (eg, 95% confidence interval). Make clear which confounders were adjusted for and why they were included | Yes | 8-11, Table 2,3,4 |
|                          |     | (b) Report category boundaries when continuous variables were categorized                                                                                                                                    | Yes | 8-11, Table 2,3,4 |
|                          |     | (c) If relevant, consider translating estimates of relative risk into absolute risk for a meaningful time period                                                                                             | N/A |                   |
| Other analyses           | 17  | Report other analyses done—eg analyses of subgroups and interactions, and sensitivity analyses                                                                                                               | Yes | 11                |
| <b>Discussion</b>        |     |                                                                                                                                                                                                              |     |                   |
| Key results              | 18  | Summarize key results with reference to study objectives                                                                                                                                                     | Yes | 12                |
| Limitations              | 19  | Discuss limitations of the study, taking into account sources of potential bias or imprecision. Discuss both direction and magnitude of any potential bias                                                   | Yes | 14                |
| Interpretation           | 20  | Give a cautious overall interpretation of results considering objectives, limitations, multiplicity of analyses, results from similar studies, and other relevant evidence                                   | Yes | 12-14             |
| Generalisability         | 21  | Discuss the generalisability (external validity) of the study results                                                                                                                                        | Yes | 13-14             |
| <b>Other information</b> |     |                                                                                                                                                                                                              |     |                   |
| Funding                  | 22  | Give the source of funding and the role of the funders for the present study and, if applicable, for the original study on which the present article is based                                                | Yes | 25                |
